# Supplementary material
Source: PubMed Central journal article supplement (PMC3811414)
Supplement: AAC.00641-13_zac010132178so1.pdf [file AAC.00641-13_zac010132178so1.pdf]

1 **Table S1. Sequence types and phylogenetic groups of 41 isolates included in the other sequence**  
 2 **types (OST) group.**

| ST complex | ST (phylogenetic group, number of isolates)                                                                                                                                         |
|------------|-------------------------------------------------------------------------------------------------------------------------------------------------------------------------------------|
| 38         | 38 (D, 8)                                                                                                                                                                           |
| 23         | 23 (A, 2), 2505 (A, 1)                                                                                                                                                              |
| 446        | 602 (B1, 3)                                                                                                                                                                         |
| 95         | 95 (B2, 1), 421 (B2, 1)                                                                                                                                                             |
| 155        | 58 (B1, 1), 1049 (B1, 1)                                                                                                                                                            |
| 354        | 354 (D, 2)                                                                                                                                                                          |
| 10         | 10 (A, 1)                                                                                                                                                                           |
| 12         | 12 (B2, 1)                                                                                                                                                                          |
| 46         | 2450 (A, 1)                                                                                                                                                                         |
| 350        | 57 (D, 1)                                                                                                                                                                           |
| 394        | 3560 (D, 1)                                                                                                                                                                         |
| Singletons | 68 (D, 2), 117 (D, 2), 216 (A, 1), 345 (B1, 1), 359 (B1, 1),<br>501 (D, 1), 533 (B1, 1), 648 (D, 1), 705 (D, 1), 720 (D, 1),<br>1485 (D, 1), 1642 (B1, 1), 2216 (D, 1), 2309 (D, 1) |

3 ST3560 is a novel ST found in this study.

4

5 **Table S2. IncF replicon sequence types.**

| FAB formula | Clonal groups, numbers of isolates |                     |                 |               |
|-------------|------------------------------------|---------------------|-----------------|---------------|
|             | ST131-O25b<br>(n=41)               | ST131-O16<br>(n=26) | ST405<br>(n=41) | OST<br>(n=41) |
| F-:A-:B-    |                                    | 2                   |                 | 6             |
| F-:A-:B1    |                                    |                     | 1               |               |
| F-:A-:B10   |                                    |                     |                 | 1             |
| F-:A-:B29   |                                    | 1                   |                 |               |
| F-:A1:B1    |                                    |                     |                 | 3             |
| F-:A2:B20   | 1                                  |                     |                 |               |
| F-:A6:B20   |                                    |                     | 1               |               |
| F1:A-:B20   | 2                                  |                     |                 |               |
| F1:A-:B23   |                                    |                     |                 | 1             |
| F1:A1:B1    |                                    | 4                   | 2               | 1             |
| F1:A1:B10   |                                    |                     | 1               |               |
| F1:A1:B16   |                                    |                     | 1               |               |
| F1:A1:B23   |                                    | 4                   |                 | 1             |
| F1:A2:B-    | 1                                  |                     |                 |               |
| F1:A2:B20   | 17                                 | 4                   | 3               | 2             |
| F1:A6:B1    |                                    | 1                   |                 |               |
| F1:A6:B20   | 2                                  |                     | 9               |               |
| F1:A7:B23   |                                    |                     |                 | 3             |
| F2:A-:B-    |                                    |                     | 4               |               |

|            |   |   |   |   |
|------------|---|---|---|---|
| F2:A-:B1   |   |   | 2 | 1 |
| F2:A-:B10  |   | 1 |   |   |
| F2:A-:B6   |   |   | 1 |   |
| F2:A1:B-   | 6 |   | 2 |   |
| F2:A1:B1   |   |   |   | 1 |
| F2:A1:B23  | 2 |   |   | 1 |
| F2:A2:B-   | 2 |   |   | 1 |
| F2:A2:B20  | 3 |   |   |   |
| F2:A6:B-   | 1 |   |   |   |
| F2:A6:B1   |   |   |   | 1 |
| F2:A6:B20  | 1 |   |   |   |
| F18:A-:B1  | 1 |   |   | 4 |
| F18:A-:B34 |   |   |   | 1 |
| F18:A-:B8  |   |   |   | 1 |
| F22:A1:B20 | 1 |   |   | 1 |
| F24:A-:B1  |   |   |   | 2 |
| F29:A-:B-  |   |   | 2 |   |
| F29:A-:B10 |   | 5 | 1 |   |
| F29:A-:B20 |   |   | 1 |   |
| F29:A2:B10 |   | 1 |   |   |
| F31:A-:B1  |   |   |   | 1 |
| F31:A-:B6  |   |   | 5 |   |
| F31:A1:B6  |   |   | 1 |   |

|            |   |   |   |   |
|------------|---|---|---|---|
| F31:A4:B10 |   |   | 1 |   |
| F35:A-:B10 |   |   | 1 |   |
| F35:A-:B33 |   |   |   | 1 |
| F35:A2:B-  | 1 |   |   |   |
| F36:A-:B32 |   |   | 1 |   |
| F53:A-:B23 |   |   |   | 1 |
| F55:A1:B1  |   |   |   | 1 |
| F58:A-:B-  |   |   | 1 |   |
| F59:A-:B29 |   | 1 |   |   |
| F61:A-:B30 |   |   |   | 1 |
| F62:A-:B1  |   |   |   | 1 |
| F64:A1:B27 |   |   |   | 1 |
| F65:A-:B1  |   |   |   | 2 |
| F65:A1:B23 |   | 1 |   |   |
| F66:A4:B-  |   | 1 |   |   |
| F31:A-:B1  |   |   |   | 1 |
| F31:A-:B6  |   |   | 5 |   |
| F31:A1:B6  |   |   | 1 |   |
| F31:A4:B10 |   |   | 1 |   |
| F35:A-:B10 |   |   | 1 |   |
| F35:A-:B33 |   |   |   | 1 |
| F35:A2:B-  | 1 |   |   |   |
| F36:A-:B32 |   |   | 1 |   |

6 OST, other sequence types.  
7 FAB (FII:FIA:FIB) formula represented the allele type and number identified for each replicon. The F-,  
8 A-, or B- symbols indicated the absence of its replicon. Novel alleles identified in this study were 58, 59,  
9 61, 62, 64, and 65 for FII, 7 for FIA, and 29, 30, 32, 33, and 34 for FIB.
